# Supplementary material for: α,ω-Bis(trialkoxysilyl) difunctionalized polycyclooctenes from ruthenium-catalyzed chain-transfer ring-opening metathesis polymerization
Source: Royal Society of Chemistry journal article supplement (doi:10.1039/c6py00849f), 2016-01-01
Supplement: c6py00849f1.pdf [file c6py00849f1.pdf]

## Supporting Information for

### $\alpha,\omega$ -Bis(Trialkoxysilyl) Difunctionalized Polycyclooctenes from Ruthenium-Catalyzed Chain-Transfer Ring-Opening Metathesis Polymerization

**Figure S1.**  $^1\text{H}$  NMR spectrum (500 MHz,  $\text{CDCl}_3$ , 298 K) of CTA **2**

**Figure S2.**  $^{13}\text{C}\{^1\text{H}\}$  NMR spectrum (125 MHz,  $\text{CDCl}_3$ , 298 K) of CTA **2**

**Figure S3.**  $^1\text{H}$  NMR spectrum (500 MHz,  $\text{CDCl}_3$ , 298 K) of CTA **3-OEt**

**Figure S4.**  $^{13}\text{C}\{^1\text{H}\}$  NMR spectrum (125 MHz,  $\text{CDCl}_3$ , 298 K) of CTA **3-OEt**

**Figure S5.**  $^1\text{H}$  NMR spectrum (500 MHz,  $\text{CDCl}_3$ , 298 K) of CTA **isom-4**

**Figure S6.**  $^{13}\text{C}\{^1\text{H}\}$  NMR spectrum (125 MHz,  $\text{CDCl}_3$ , 298 K) of CTA **isom-4**

**Figure S7.** ESI-HR mass spectrum of CTA **isom-4**

**Figure S8.** FTIR spectrum of CTA **isom-4**

**Figure S9.**  $^1\text{H}$  NMR spectrum (500 MHz,  $\text{CDCl}_3$ , 298 K) of CTA **5**

**Figure S10.**  $^{13}\text{C}\{^1\text{H}\}$  NMR spectrum (125 MHz,  $\text{CDCl}_3$ , 298 K) of CTA **5**

**Figure S11.** ESI-HR mass spectrum of CTA **5**

**Figure S12.** FTIR spectrum of CTA **5**

**Figure S13.**  $^1\text{H}$  NMR spectrum (500 MHz,  $\text{CDCl}_3$ , 298 K) of CTA **6**

**Figure S14.**  $^{13}\text{C}\{^1\text{H}\}$  NMR spectrum (125 MHz,  $\text{CDCl}_3$ , 298 K) of CTA **6**

**Figure S15.** ESI-HR mass spectrum of CTA **6**

**Figure S16.** FTIR spectrum of CTA **6**

**Figure S17.**  $^{13}\text{C}\{^1\text{H}\}$  NMR spectrum (100 MHz,  $\text{CDCl}_3$ , 298 K) of a crude polymer prepared by ROMP/CM of COE using **G2** and CTA **2**.

**Figure S18.**  $^1\text{H}$ - $^1\text{H}$  COSY NMR spectrum (500 MHz,  $\text{CDCl}_3$ , 298 K) of a crude polymer prepared by ROMP/CM of COE using **G2** and CTA **2**.

**Figure S19.**  $^1\text{H}$  NMR spectrum (400 MHz,  $\text{CDCl}_3$ , 298 K) of a CNF PCOE sample isolated from a crude polymer prepared by ROMP/CM of COE using **G2** and CTA **1** (Table 1, entry 1)

**Figure S20.**  $^{13}\text{C}\{^1\text{H}\}$  NMR spectrum (100 MHz,  $\text{CDCl}_3$ , 298 K) of a CNF PCOE sample isolated from a crude polymer prepared by ROMP/CM of COE using **G2** and CTA **1** (Table 1, entry 1)

**Figure S21.** SEC traces of PCOE samples prepared from the ROMP/CM of COE using **G2** catalyst and CTAs **2** or **5** in  $\text{CH}_2\text{Cl}_2$  at 40 °C for 24 h (Table 2, entries 10, 16, 20).

**Figure S22.** DEPT 135  $^{13}\text{C}\{^1\text{H}\}$  NMR spectrum (100 MHz,  $\text{CDCl}_3$ , 298 K) of a crude polymer sample prepared by ROMP/CM of COE using **G2** and CTA **2** (Table 1, entry 2).

**Figure S23.**  $^1\text{H}$  NMR spectrum (400 MHz,  $\text{CDCl}_3$ , 298 K) of CNF PCOE isolated from a crude polymer prepared by ROMP/CM of COE using **G2** and CTA **2** (Table 2, entry 10)

**Figure S24.**  $^{13}\text{C}\{^1\text{H}\}$  NMR spectrum (100 MHz,  $\text{CDCl}_3$ , 298 K) of CNF PCOE isolated from a crude polymer prepared by ROMP/CM of COE using **G2** and CTA **2** (Table 2, entry 10)

**Figure S25.**  $^1\text{H}$  NMR spectrum (500 MHz,  $\text{CDCl}_3$ , 298 K) of a crude polymer prepared by ROMP/CM of COE using **G2** and CTA **3-OMe** (Table 1, entry 4).

**Figure S26.**  $^{13}\text{C}\{^1\text{H}\}$  NMR spectrum (100 MHz,  $\text{CDCl}_3$ , 298 K) of a crude polymer prepared by ROMP/CM of COE using **G2** and CTA **3-OMe** (Table 1, entry 4).

**Figure S27.** ESI-HRMS spectrum, ionized with  $\text{Na}^+$ , of a crude polymer prepared by ROMP/CM of COE using **G2** and CTA **3-OMe** (Table 1, entry 4).

**Figure S28.** FTIR spectrum of a crude polymer prepared by ROMP/CM of COE using **G2** and CTA **3-OMe** (Table 1, entry 4).

**Figure S29.**  $^1\text{H}$  NMR spectrum (500 MHz,  $\text{CDCl}_3$ , 298 K) of a crude polymer prepared by ROMP/CM of COE using **G2** and CTA **3-OEt** (Table 1, entry 7).

**Figure S30.**  $^{13}\text{C}\{^1\text{H}\}$  NMR spectrum (100 MHz,  $\text{CDCl}_3$ , 298 K) of a crude polymer prepared by ROMP/CM of COE using **G2** and CTA **3-OEt** (Table 1, entry 7).

**Figure S31.**  $^{13}\text{C}\{^1\text{H}\}$  NMR spectrum (100 MHz,  $\text{CDCl}_3$ , 298 K) of a crude polymer prepared by ROMP/CM of COE using **G2** and CTA **4** (Table 1, entry 8).

**Figure S32.** FTIR spectrum of a crude polymer prepared by ROMP/CM of COE using **G2** and CTA **4** (Table 1, entry 8).

**Figure S33.** MALDI-ToF mass spectrum (DCTB matrix, sodium ionizing salt: NaI) of a crude polymer prepared by ROMP/CM of COE using **G2** and CTA **4** (Table 1, entry 8), showing the presence of DF PCOE; see top zoomed region and the corresponding middle and bottom simulations for  $n = 7$ .

**Figure S34.**  $^1\text{H}$  NMR spectrum (500 MHz,  $\text{CDCl}_3$ , 298 K) of a crude polymer sample prepared by ROMP/CM of COE using **G2** and CTA **5** (Table 1, entry 10).

**Figure S35.**  $^{13}\text{C}\{^1\text{H}\}$  NMR spectrum (100 MHz,  $\text{CDCl}_3$ , 298 K) of a crude polymer prepared by ROMP/CM of COE using **G2** and CTA **5** (Table 1, entry 10).

**Figure S36.**  $^1\text{H}$ - $^{13}\text{C}$  HMQC NMR spectrum (125 MHz,  $\text{CDCl}_3$ , 298 K) of a crude polymer prepared by ROMP/CM of COE using **G2** and CTA **5** (Table 1, entry 10).

**Figure S37.** FTIR spectrum of a crude polymer prepared by ROMP/CM of COE using **G2** and CTA **5** (Table 1, entry 10).

**Figure S38.** MALDI-ToF mass spectrum (DCTB matrix, sodium ionizing salt: NaI) of a crude polymer prepared by ROMP/CM of COE/CTA **5** using **G2** (Table 1, entry 10), showing

the presence of DF PCOE; see top zoomed region and the corresponding middle and bottom simulations

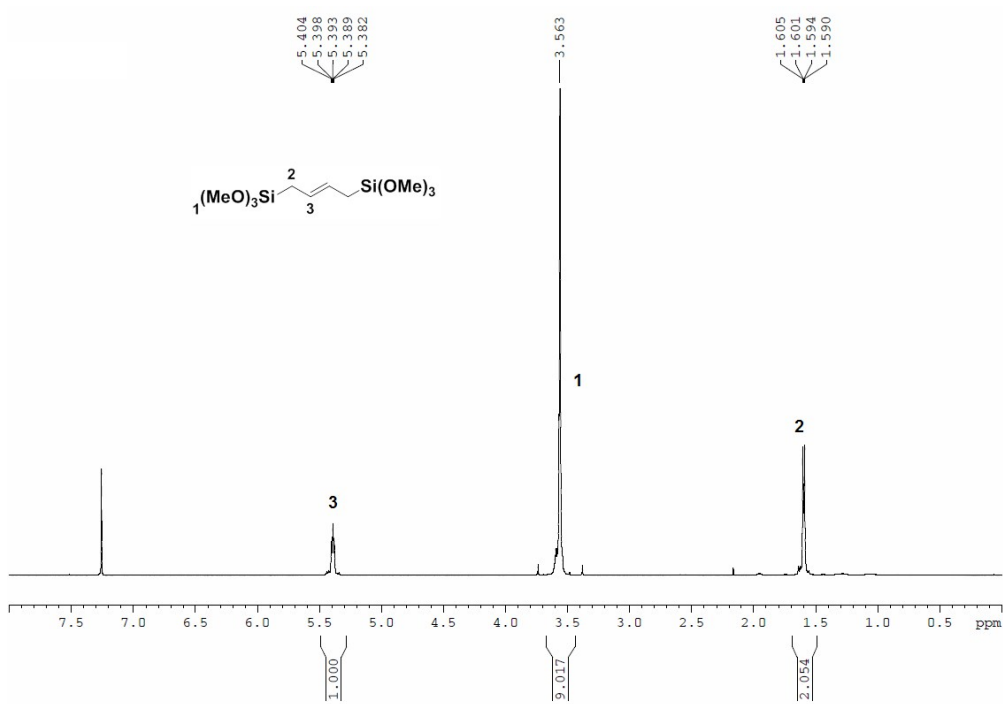

**Figure S1.**  $^1\text{H}$  NMR spectrum (500 MHz,  $\text{CDCl}_3$ , 298 K) of CTA 2

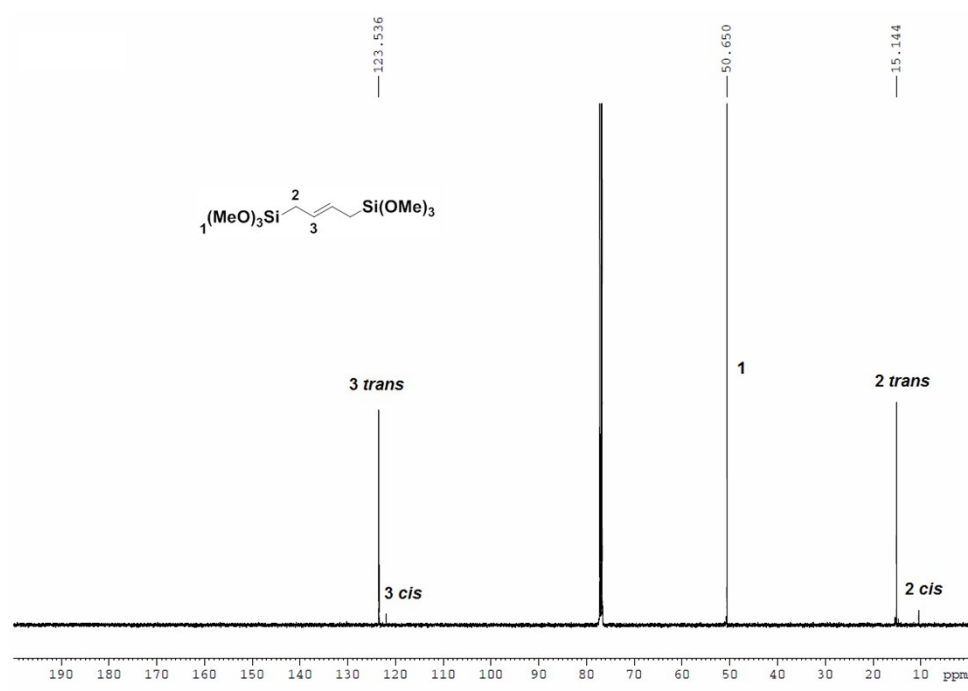

**Figure S2.**  $^{13}\text{C}\{^1\text{H}\}$  NMR spectrum (125 MHz,  $\text{CDCl}_3$ , 298 K) of CTA 2

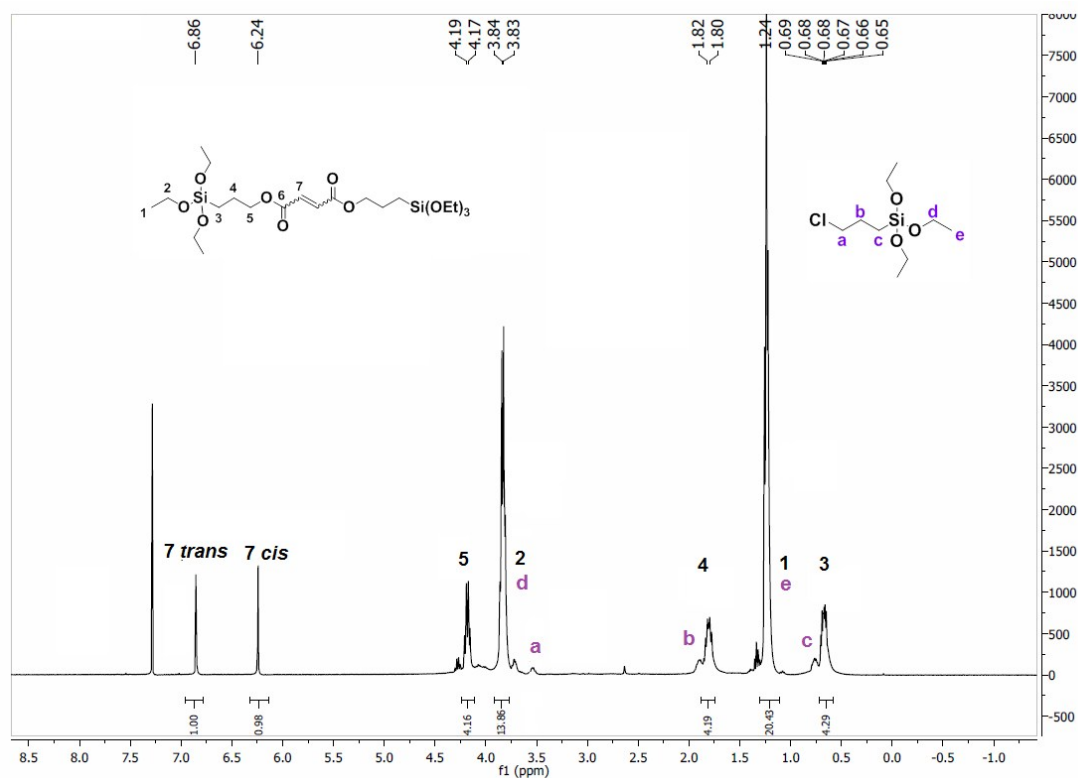

**Figure S3.**  $^1\text{H}$  NMR spectrum (500 MHz,  $\text{CDCl}_3$ , 298 K) of CTA 3-OEt

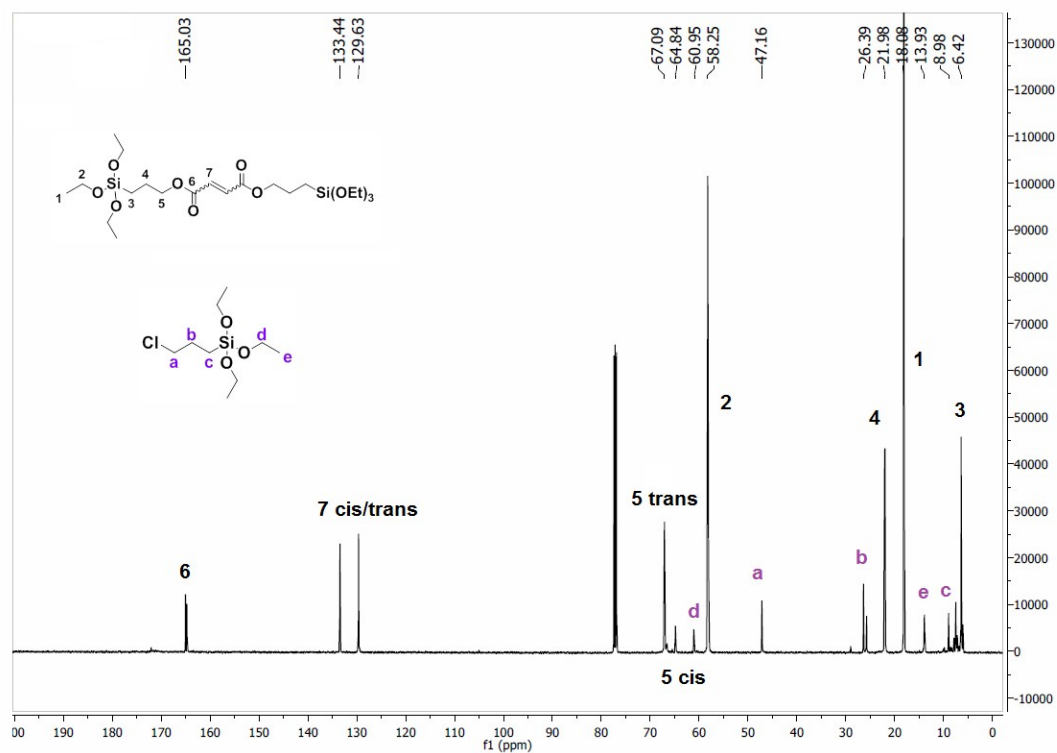

**Figure S4.**  $^{13}\text{C}\{^1\text{H}\}$  NMR spectrum (125 MHz,  $\text{CDCl}_3$ , 298 K) of CTA 3-OEt

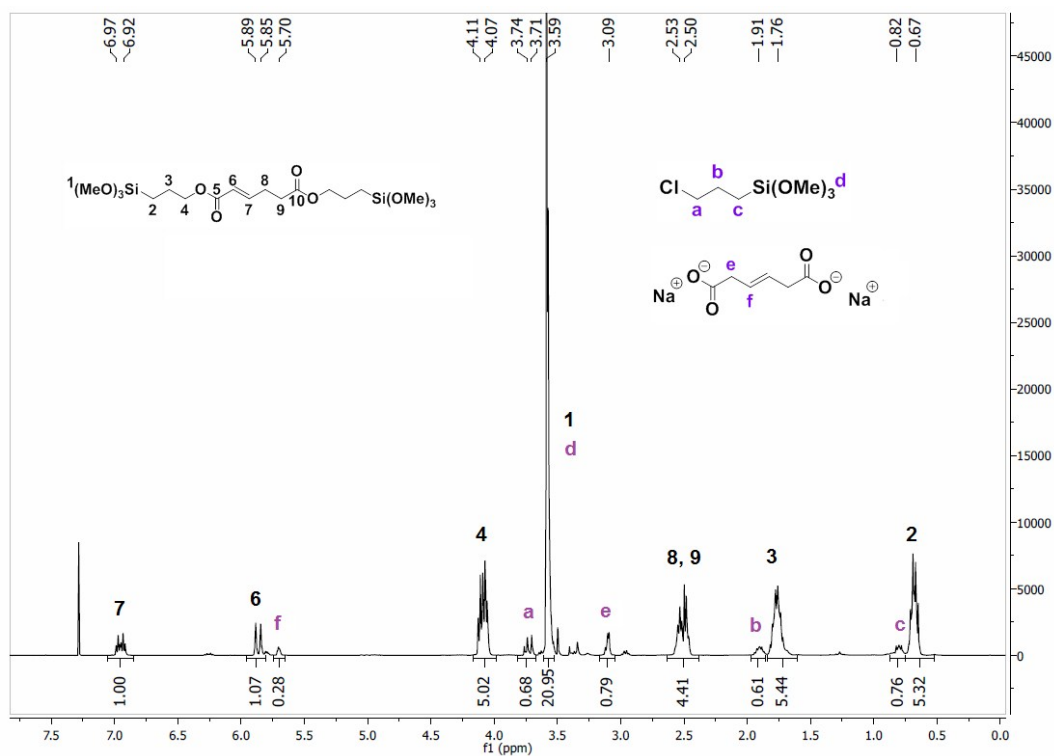

**Figure S5.**  $^1\text{H}$  NMR spectrum (500 MHz,  $\text{CDCl}_3$ , 298 K) of CTA *isom-4*

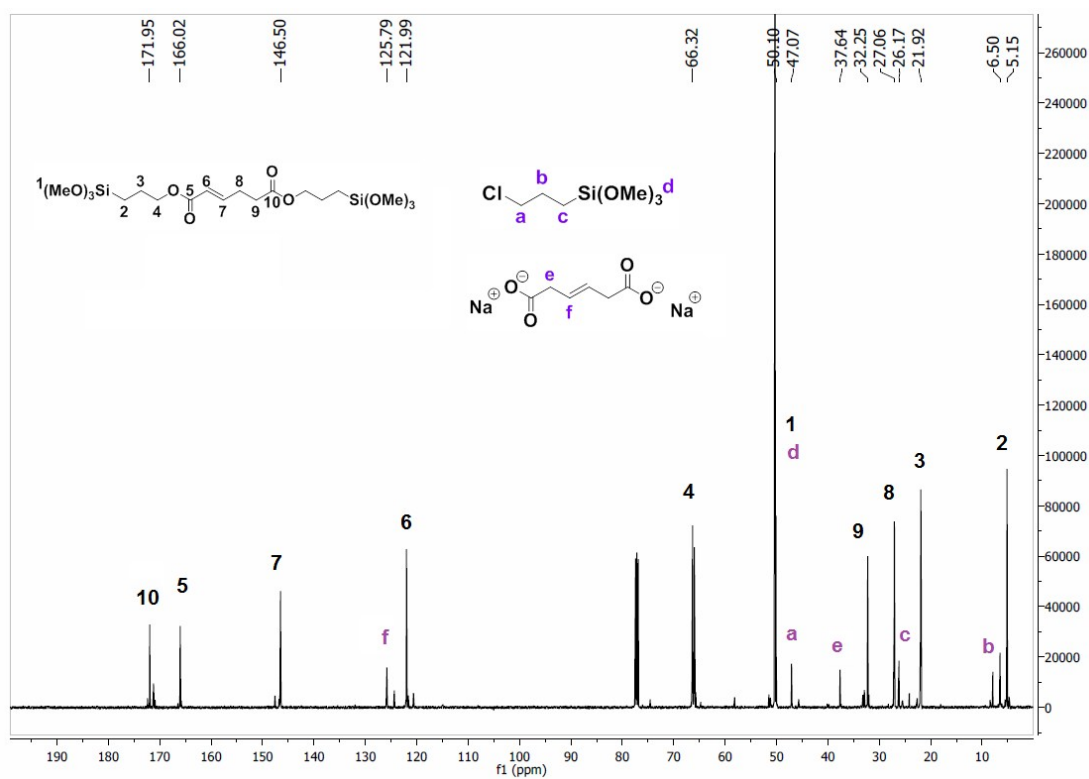

**Figure S6.**  $^{13}\text{C}\{^1\text{H}\}$  NMR spectrum (125 MHz,  $\text{CDCl}_3$ , 298 K) of CTA *isom-4*

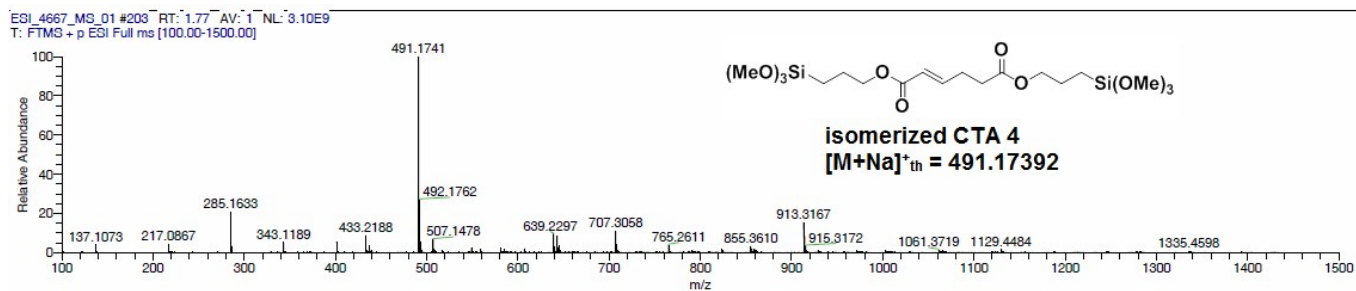

**Figure S7.** ESI-HR mass spectrum of CTA isom-4

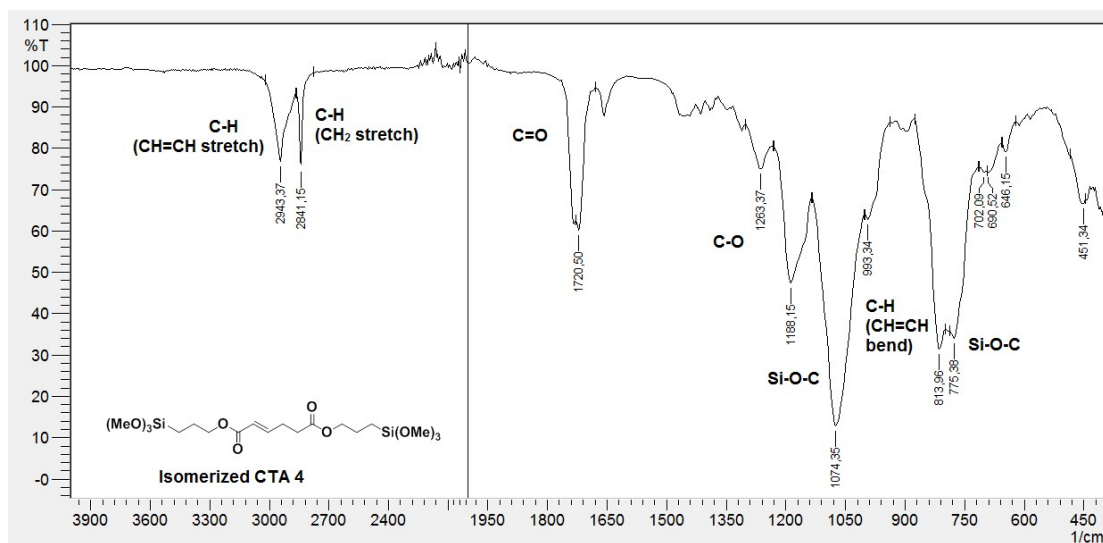

**Figure S8.** FTIR spectrum of CTA isom-4

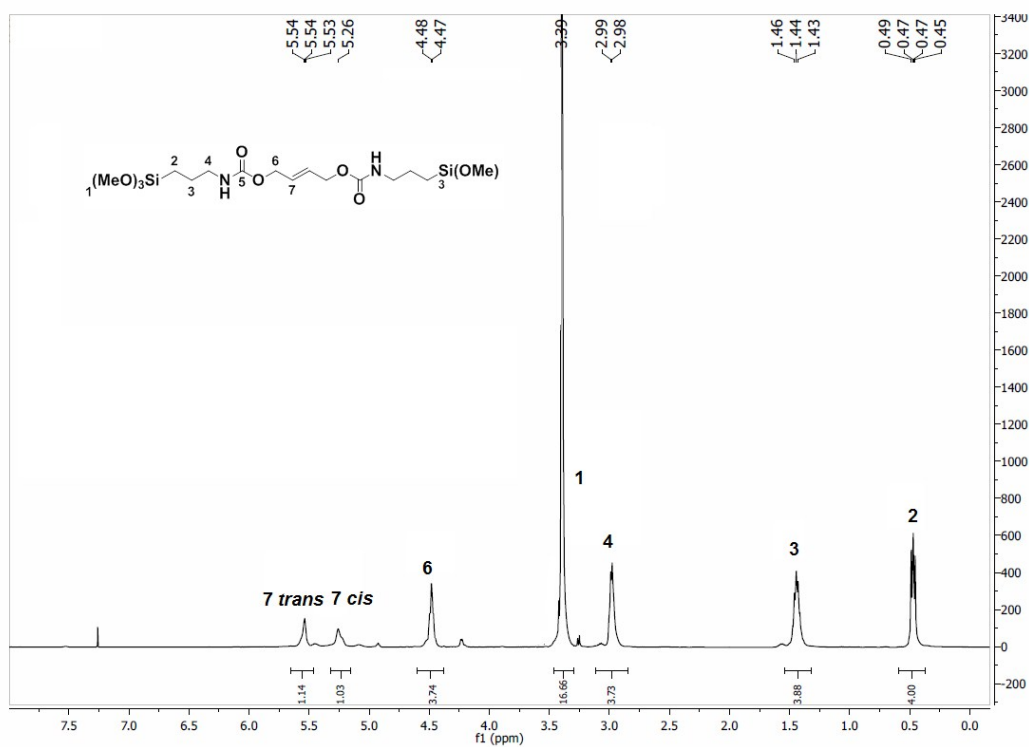

**Figure S9.** <sup>1</sup>H NMR spectrum (500 MHz, CDCl<sub>3</sub>, 298 K) of CTA 5

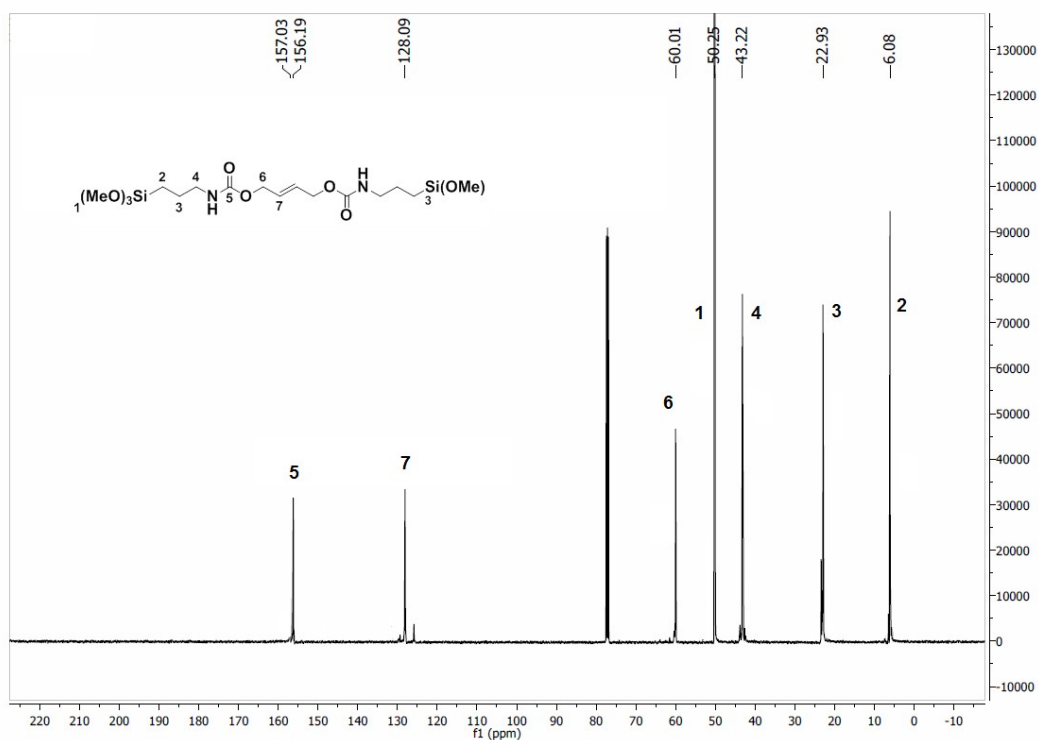

**Figure S10.** <sup>13</sup>C{<sup>1</sup>H} NMR spectrum (125 MHz, CDCl<sub>3</sub>, 298 K) of CTA 5



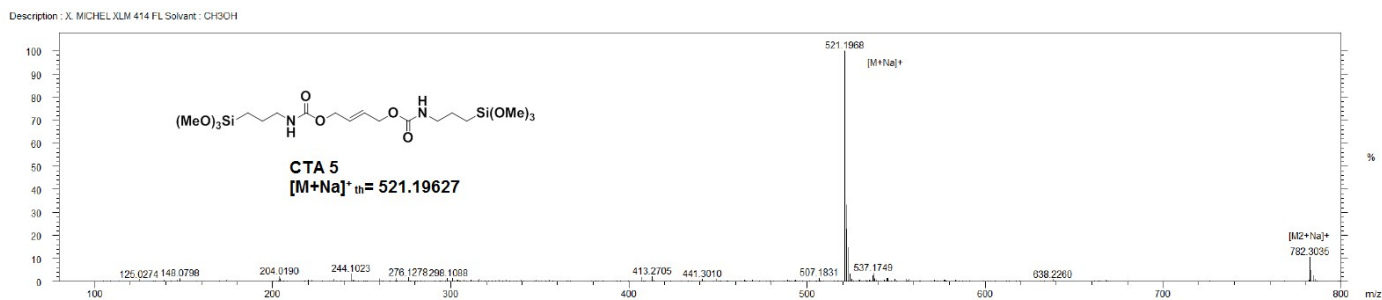

**Figure S11.** ESI-HR mass spectrum of CTA 5

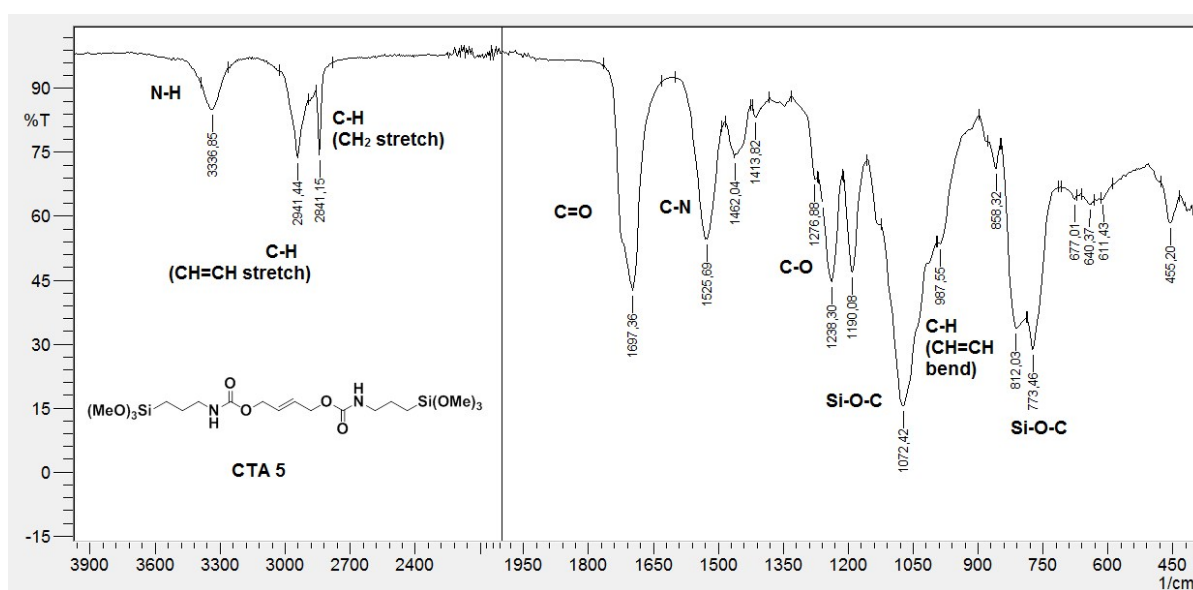

**Figure S12.** FTIR spectrum of CTA 5

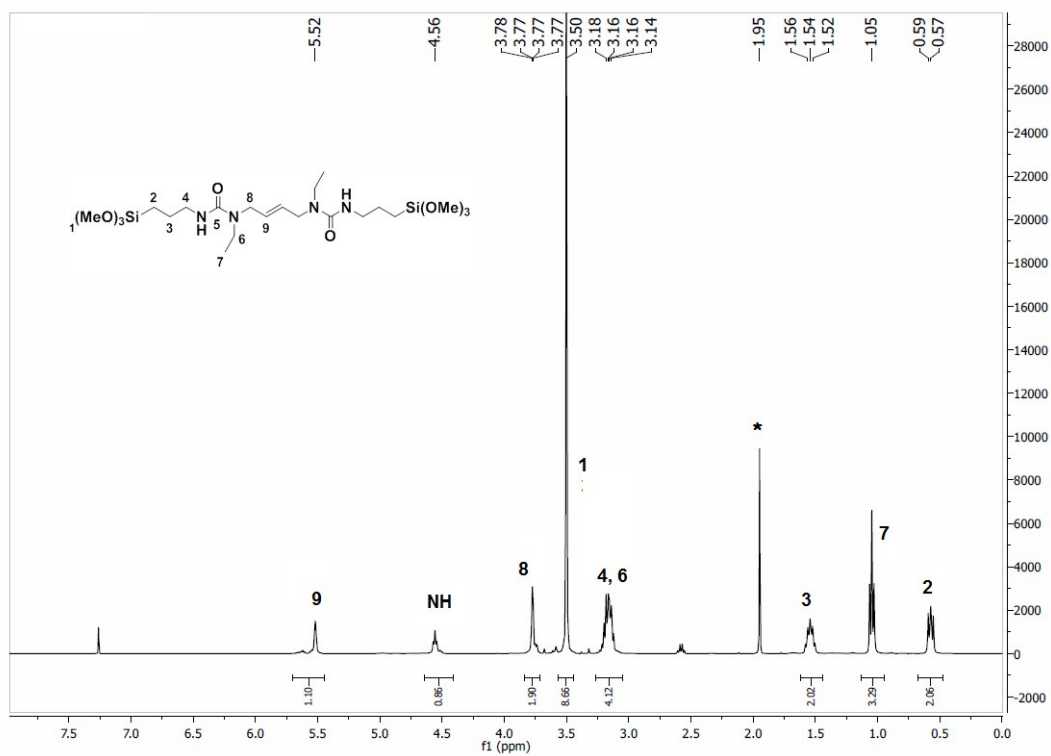

**Figure S13.**  $^1\text{H}$  NMR spectrum (500 MHz,  $\text{CDCl}_3$ , 298 K) of CTA 6

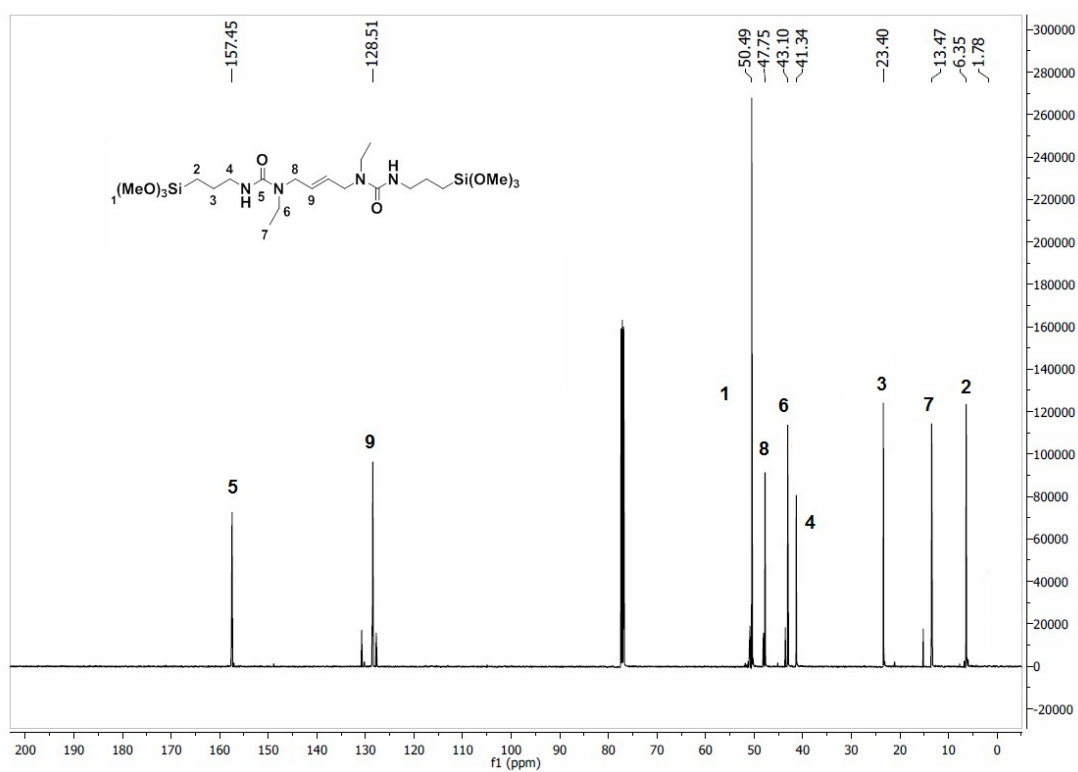

**Figure S14.**  $^{13}\text{C}\{^1\text{H}\}$  NMR spectrum (125 MHz,  $\text{CDCl}_3$ , 298 K) of CTA 6

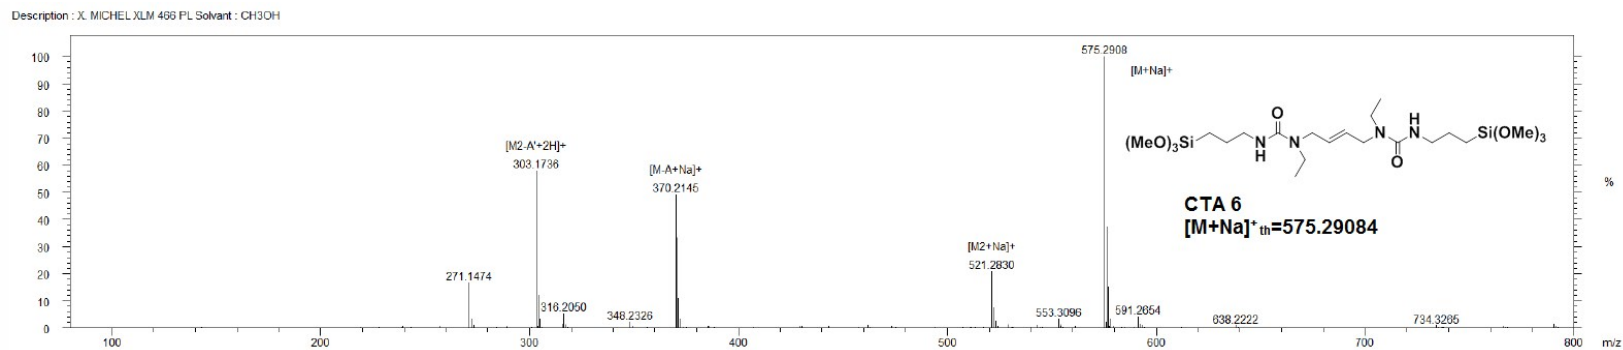

Figure S15. ESI-HR mass spectrum of CTA 6

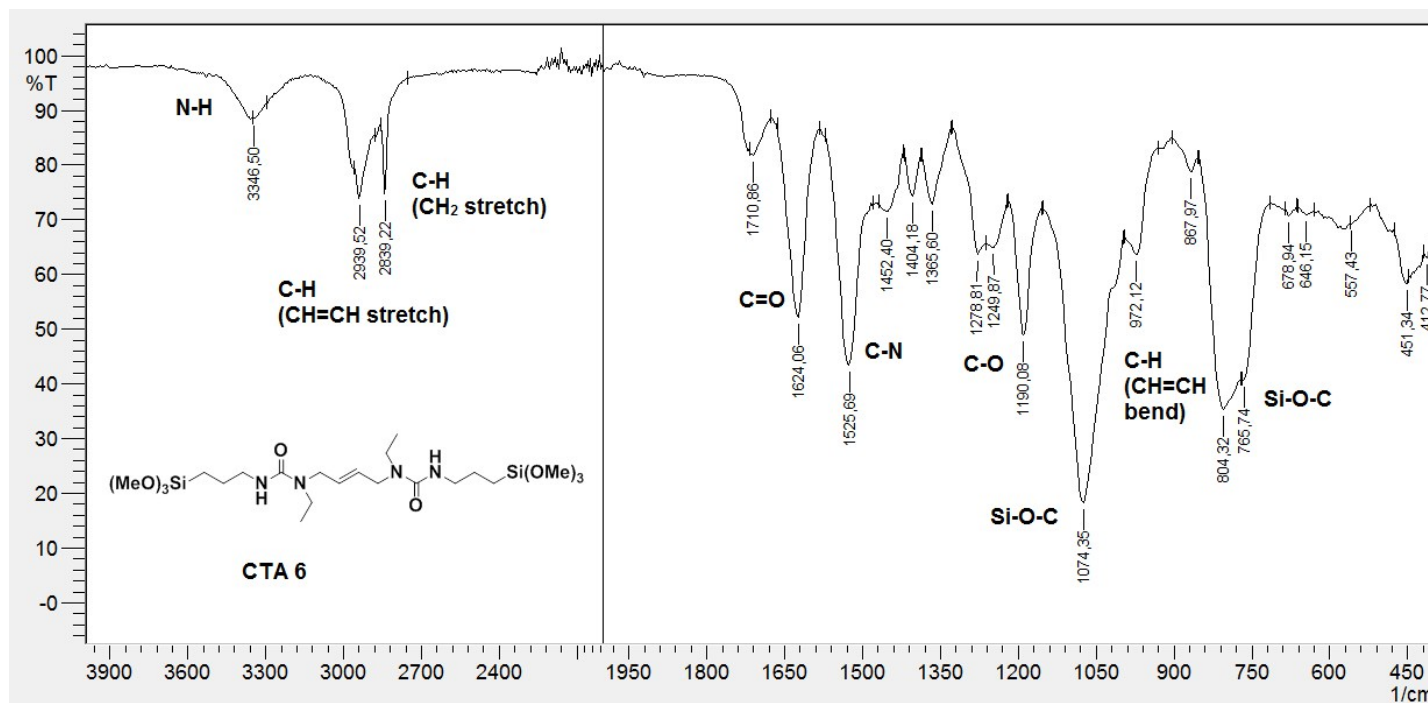

Figure S16. FTIR spectrum of CTA 6

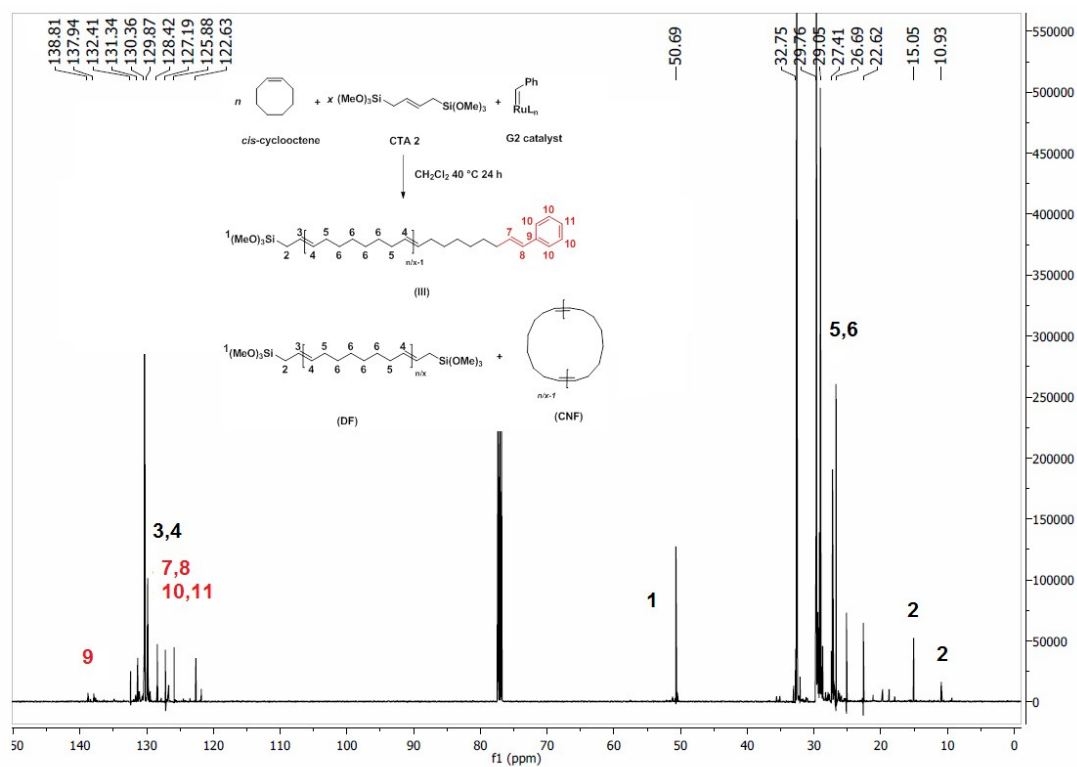

**Figure S17.**  $^{13}\text{C}\{^1\text{H}\}$  NMR spectrum (100 MHz,  $\text{CDCl}_3$ , 298 K) of a crude polymer prepared by ROMP/CM of COE using **G2** and CTA **2**.

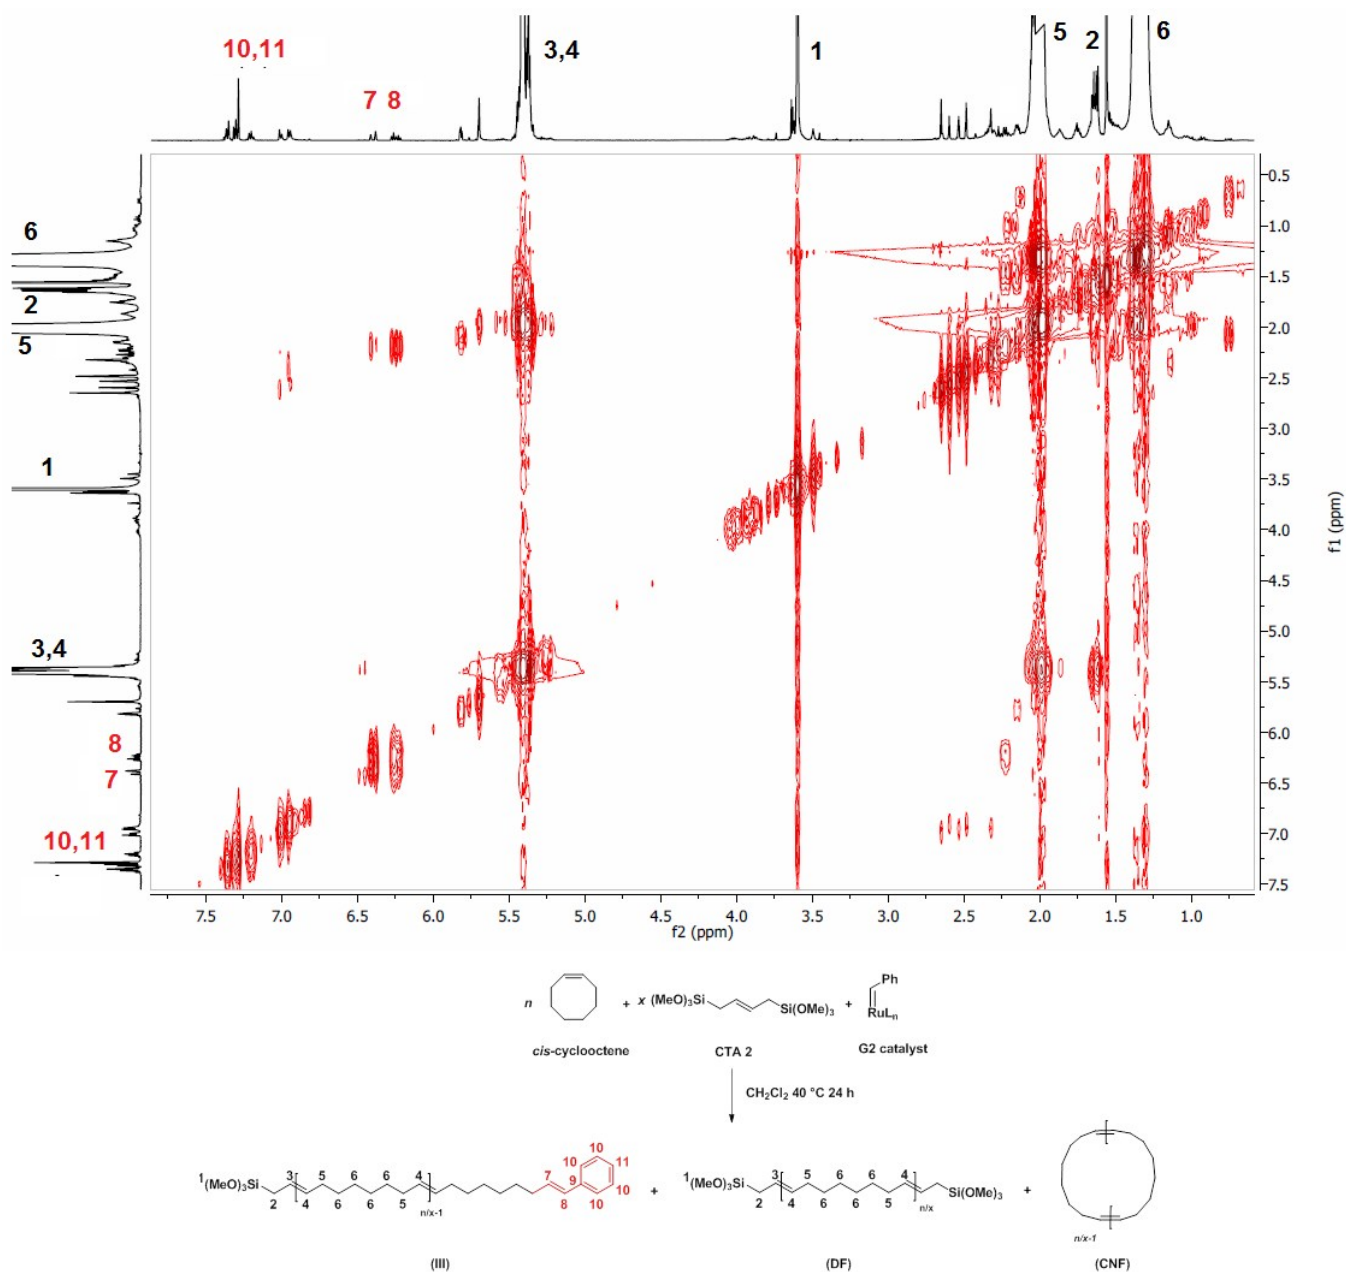

**Figure S18.**  $^1\text{H}$ - $^1\text{H}$  COSY NMR spectrum (500 MHz,  $\text{CDCl}_3$ , 298 K) of a crude polymer prepared by ROMP/CM of COE using G2 and CTA 2.

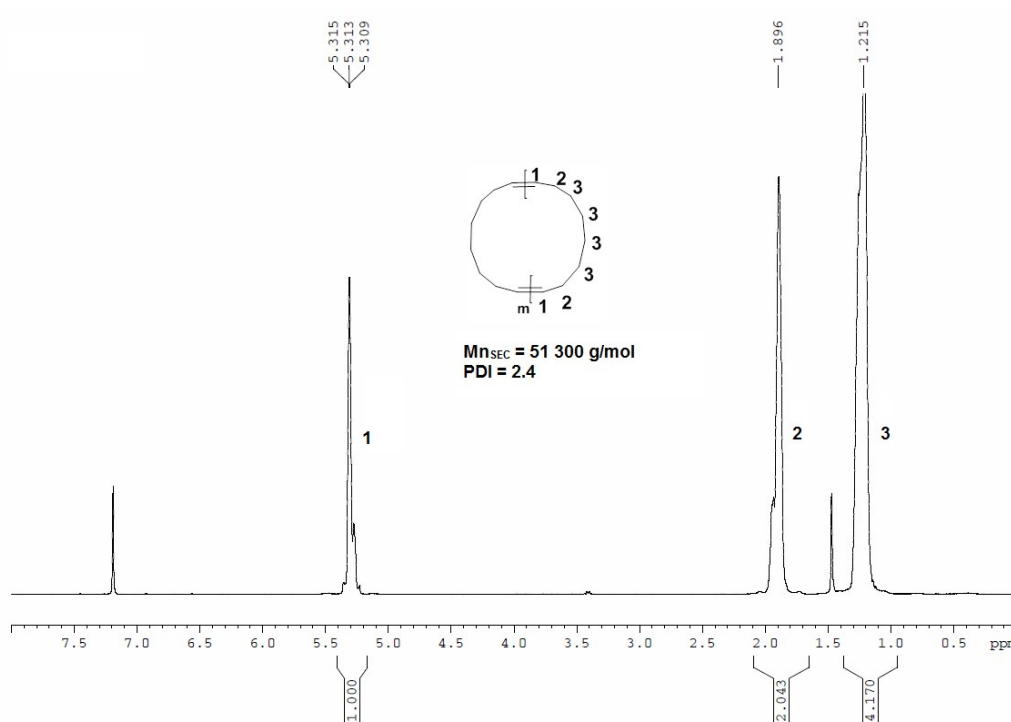

**Figure S19.**  $^1\text{H}$  NMR spectrum (400 MHz,  $\text{CDCl}_3$ , 298 K) of a CNF PCOE sample isolated from a crude polymer prepared by ROMP/CM of COE using **G2** and CTA **1** (Table 1, entry 1)

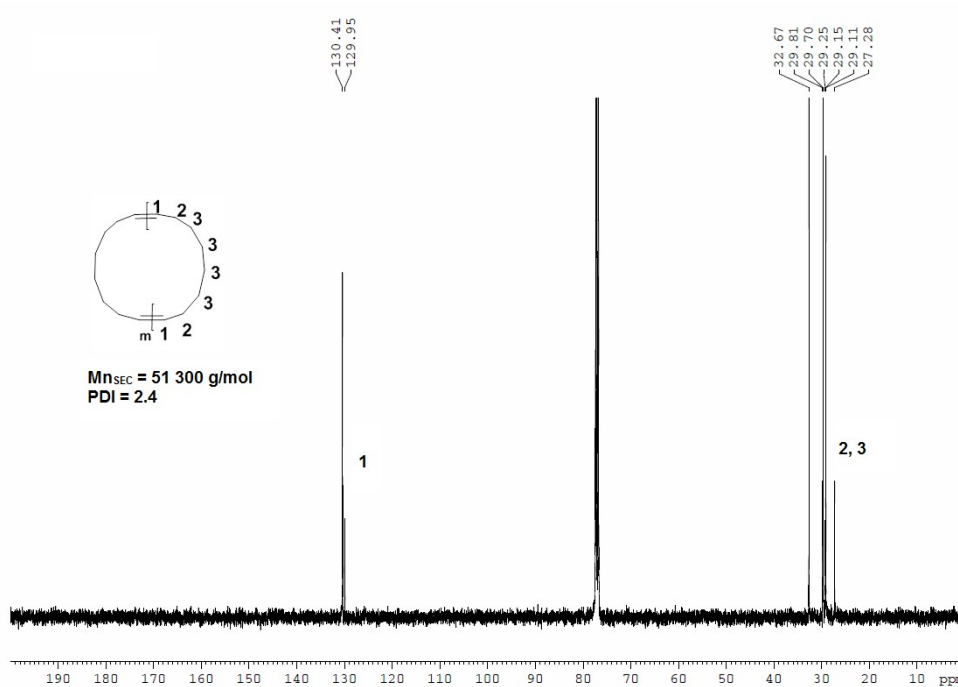

**Figure S20.**  $^{13}\text{C}\{^1\text{H}\}$  NMR spectrum (100 MHz,  $\text{CDCl}_3$ , 298 K) of a CNF PCOE sample isolated from a crude polymer prepared by ROMP/CM of COE using **G2** and CTA **1** (Table 1, entry 1)

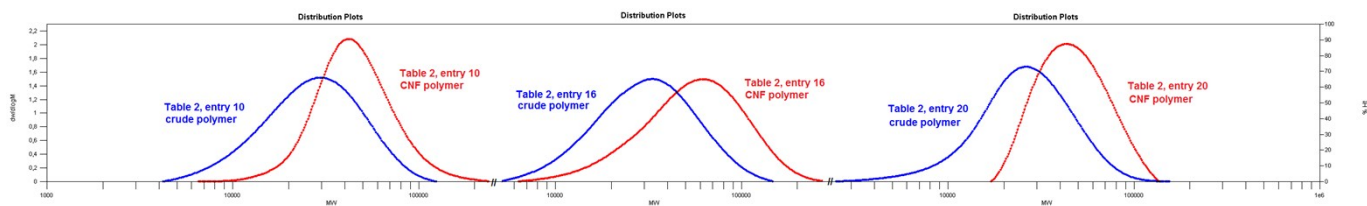

**Figure S21.** SEC traces of PCOE samples prepared from the ROMP/CM of COE using **G2** catalyst and CTAs **2** or **5** in  $\text{CH}_2\text{Cl}_2$  at  $40\text{ }^\circ\text{C}$  for 24 h (Table 2, entries 10, 16, 20).

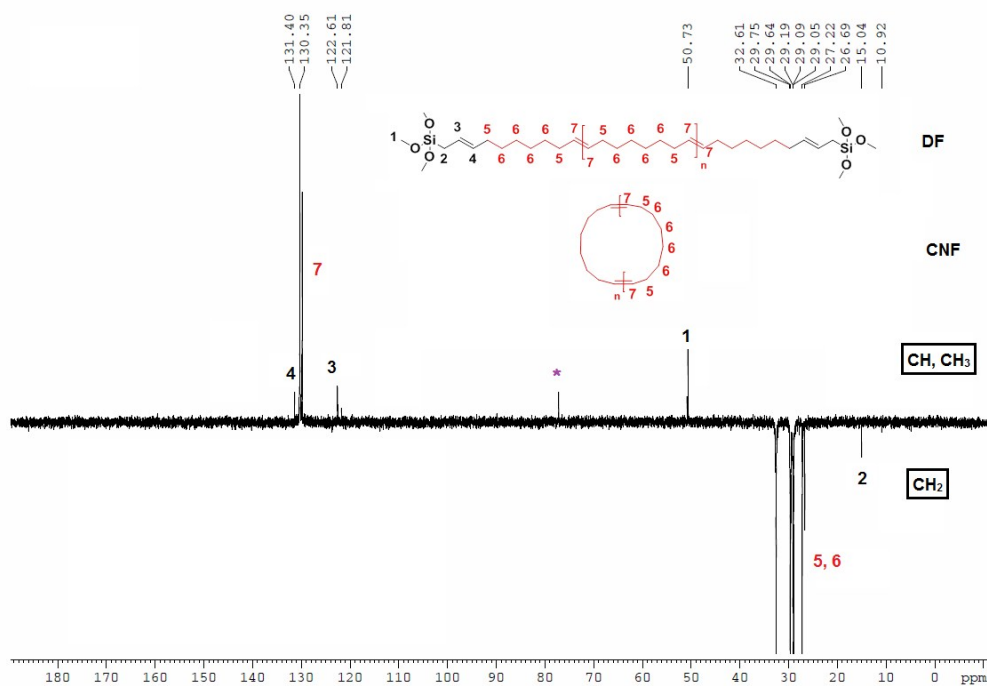

**Figure S22.** DEPT  $^{13}\text{C}\{^1\text{H}\}$  NMR spectrum (100 MHz,  $\text{CDCl}_3$ , 298 K) of a crude polymer sample prepared by ROMP/CM of COE using **G2** and CTA **2** (Table 1, entry 2).

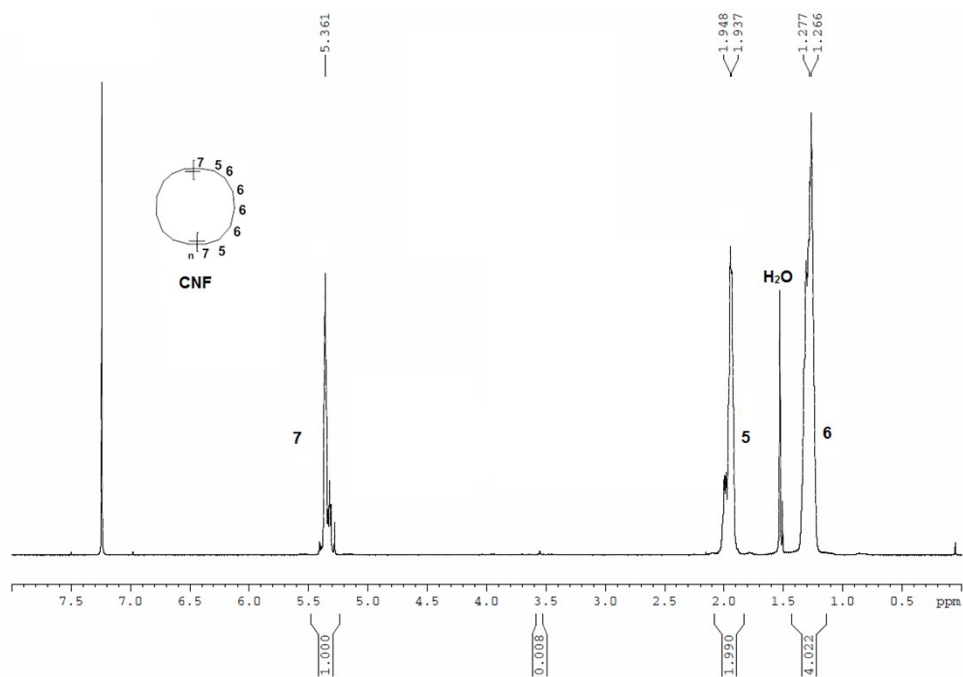

**Figure S23.**  $^1\text{H}$  NMR spectrum (400 MHz,  $\text{CDCl}_3$ , 298 K) of CNF PCOE isolated from a crude polymer prepared by ROMP/CM of COE using **G2** and CTA **2** (Table 2, entry 10)

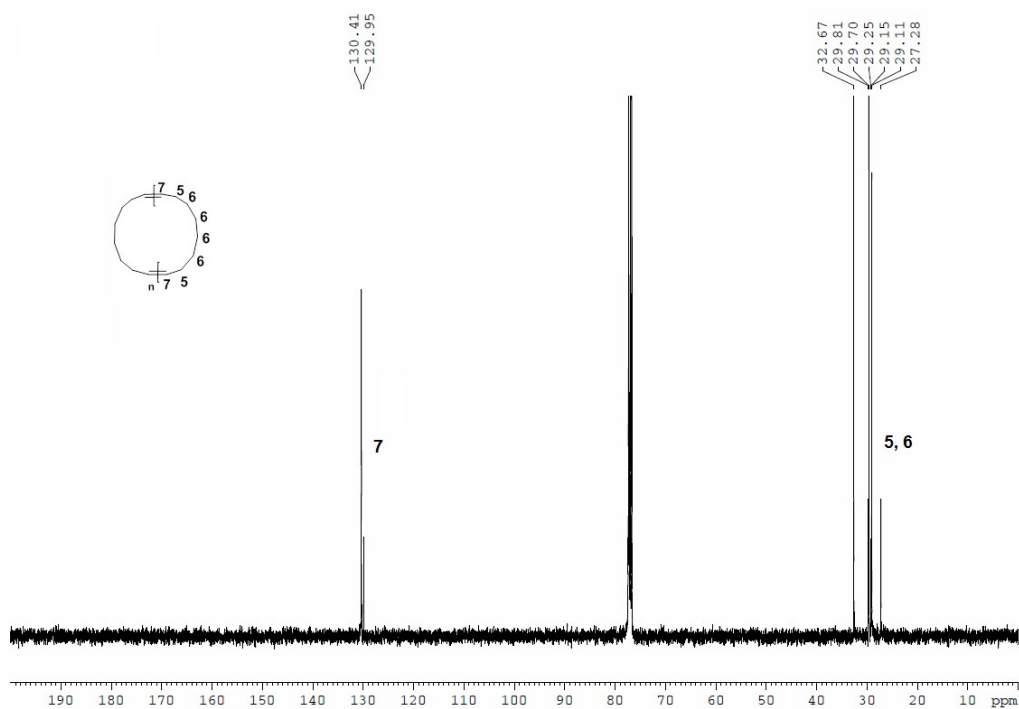

**Figure S24.**  $^{13}\text{C}\{^1\text{H}\}$  NMR spectrum (100 MHz,  $\text{CDCl}_3$ , 298 K) of CNF PCOE isolated from a crude polymer prepared by ROMP/CM of COE using **G2** and CTA **2** (Table 2, entry 10).



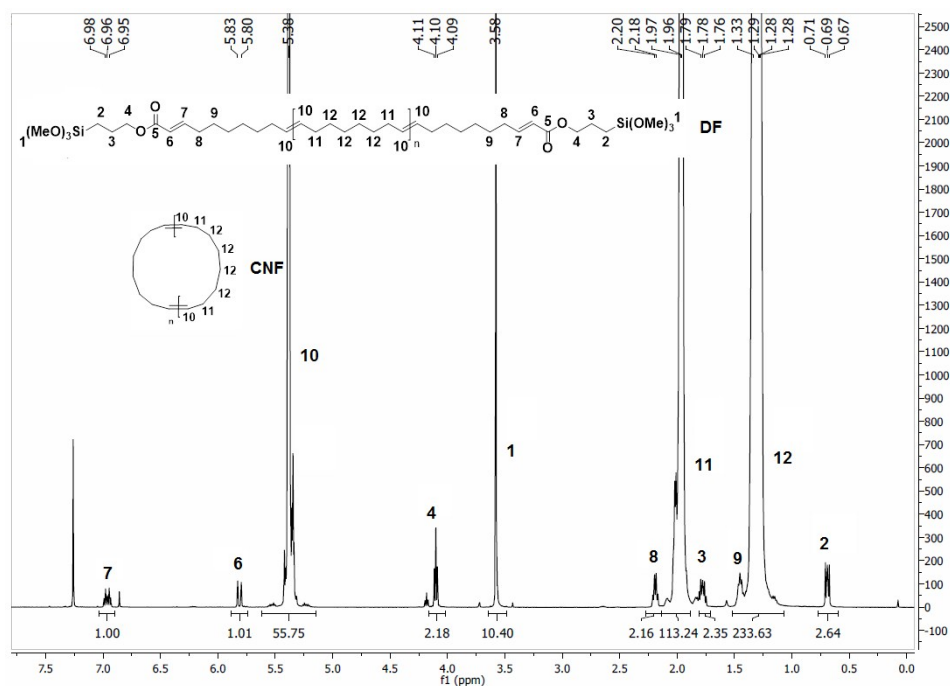

**Figure S25.**  $^1\text{H}$  NMR spectrum (500 MHz,  $\text{CDCl}_3$ , 298 K) of a crude polymer prepared by ROMP/CM of COE using **G2** and CTA **3-OMe** (Table 1, entry 4).

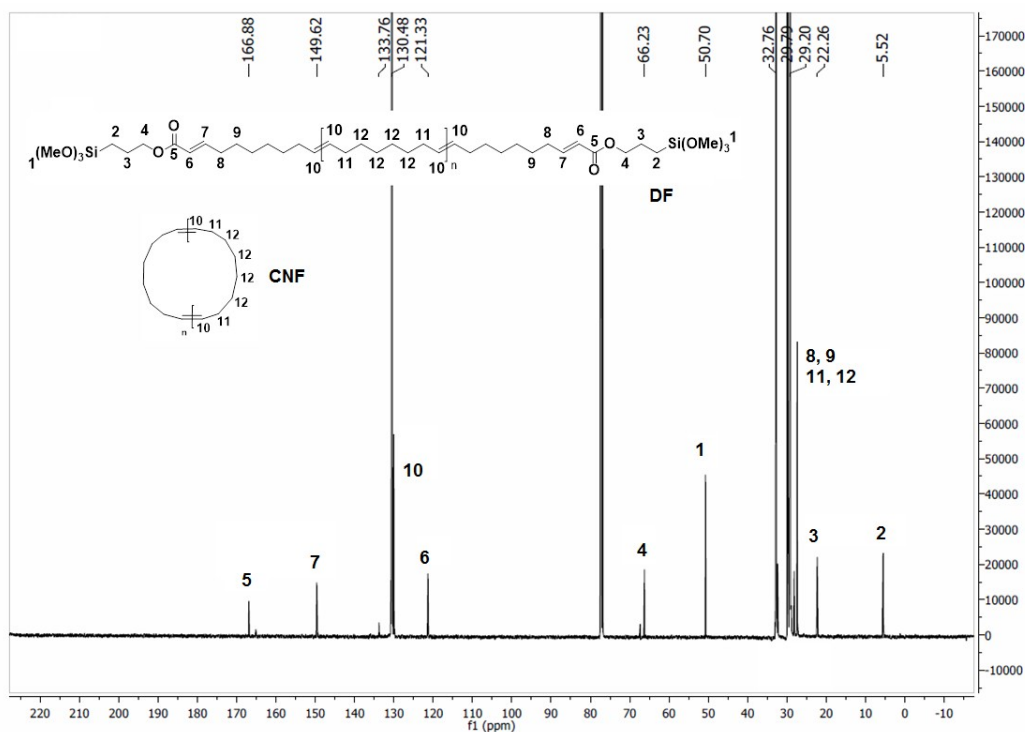

**Figure S26.**  $^{13}\text{C}\{^1\text{H}\}$  NMR spectrum (100 MHz,  $\text{CDCl}_3$ , 298 K) of a crude polymer prepared by ROMP/CM of COE using **G2** and CTA **3-OMe** (Table 1, entry 4).

ESI\_3630\_MS\_01 #1-230 RT: 0.01-2.01 AV: 230 NL: 2.10E7  
T: FTMS + p ESI Full lock ms [200.00-3000.00]

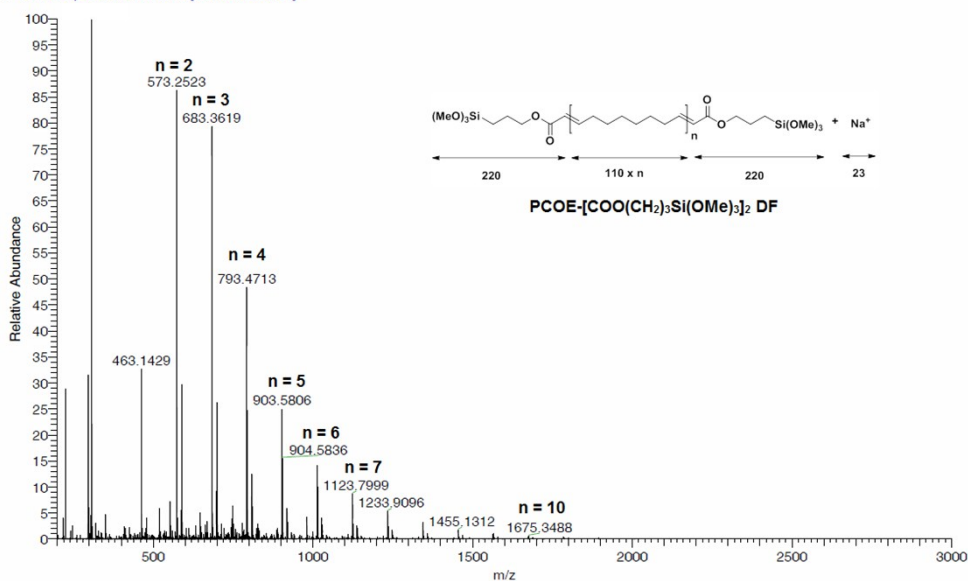

**Figure S27.** ESI-HRMS spectrum, ionized with  $\text{Na}^+$ , of a crude polymer prepared by ROMP/CM of COE using **G2** and CTA **3-OMe** (Table 1, entry 4).

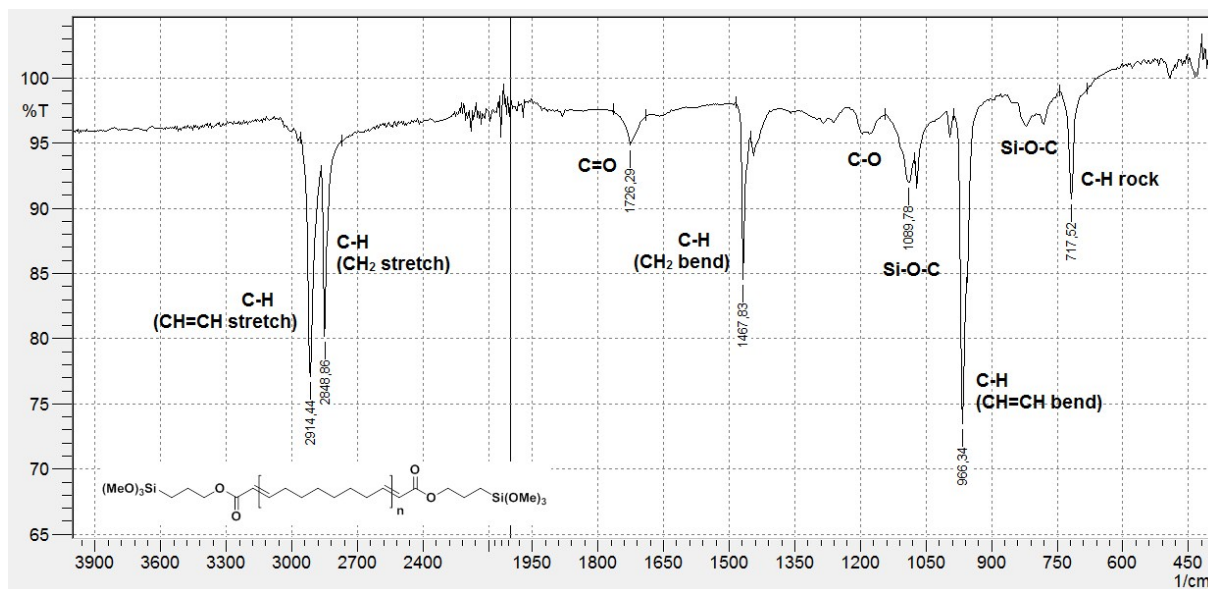

**Figure S28.** FTIR spectrum of a crude polymer prepared by ROMP/CM of COE using **G2** and CTA **3-OMe** (Table 1, entry 4).



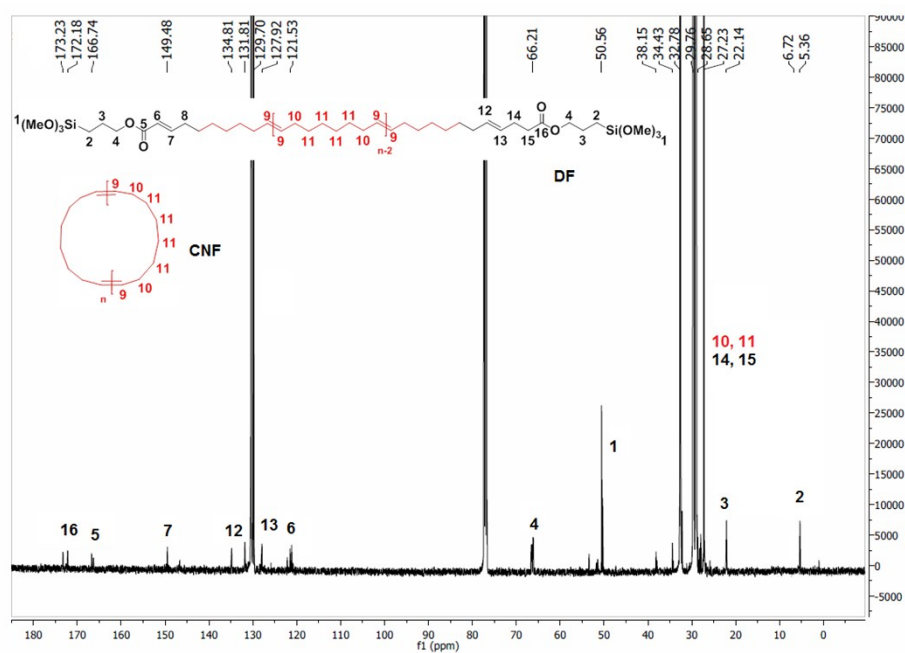

**Figure S31.**  $^{13}\text{C}\{^1\text{H}\}$  NMR spectrum (100 MHz,  $\text{CDCl}_3$ , 298 K) of a crude polymer prepared by ROMP/CM of COE using **G2** and CTA **4** (Table 1, entry 8).

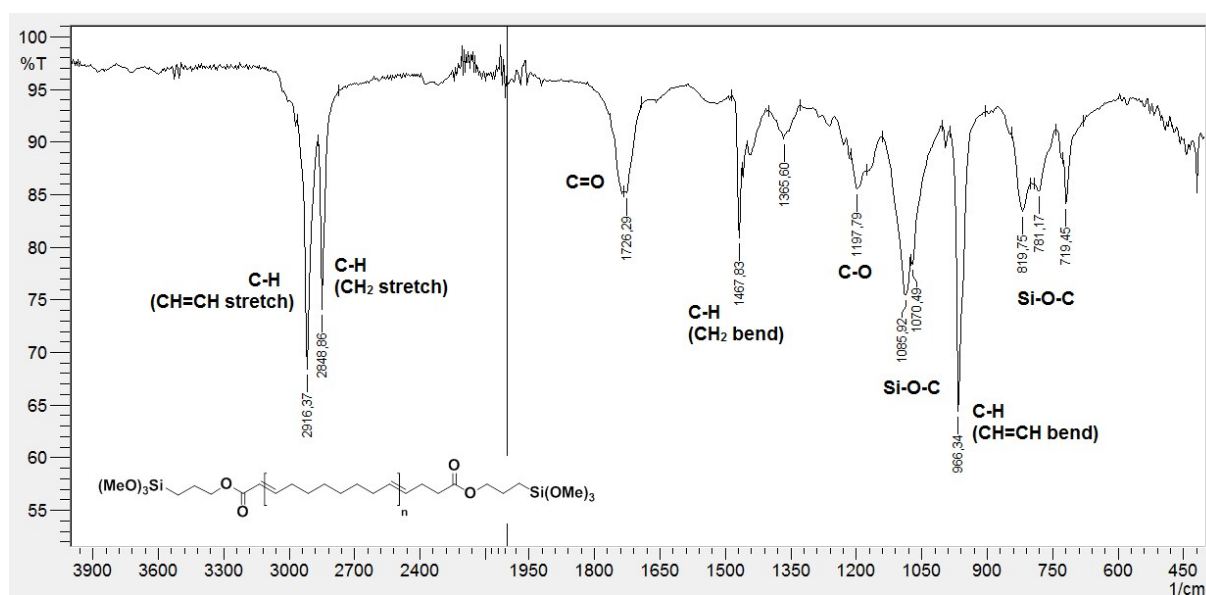

**Figure S32.** FTIR spectrum of a crude polymer prepared by ROMP/CM of COE using **G2** and CTA **4** (Table 1, entry 8).

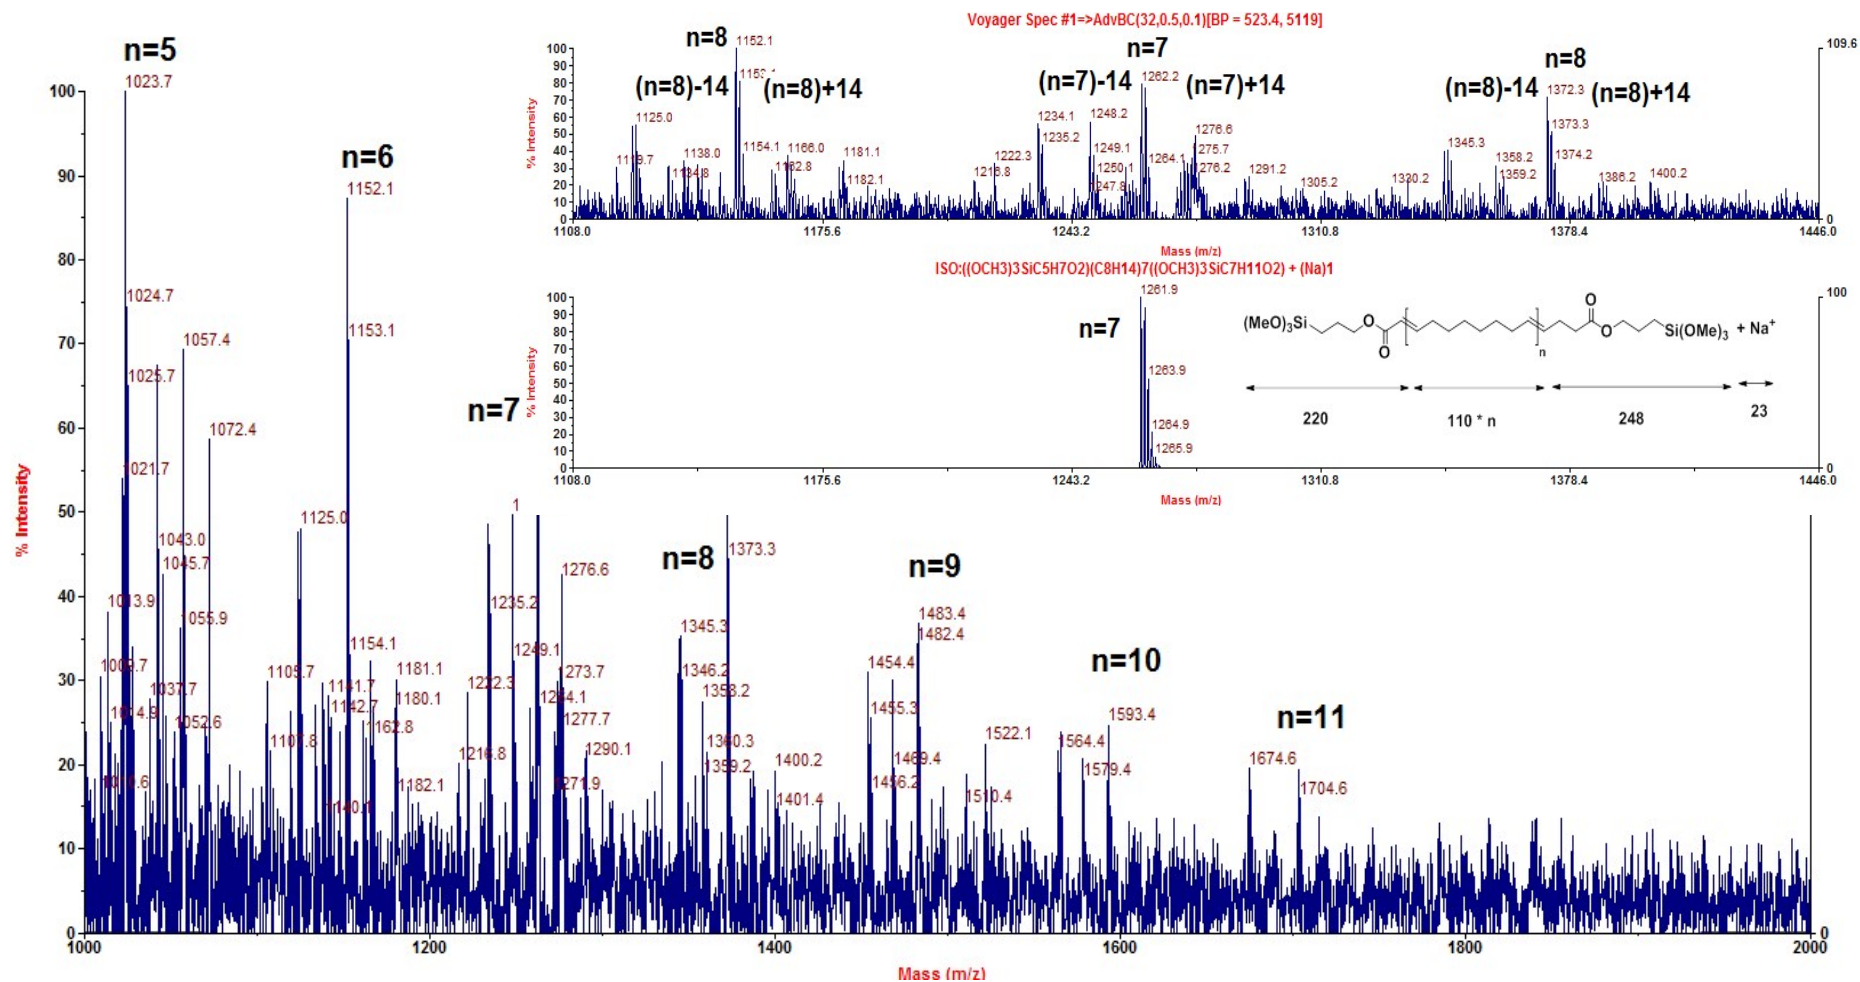

**Figure S33.** MALDI-ToF mass spectrum (DCTB matrix, sodium ionizing salt: NaI) of a crude polymer prepared by ROMP/CM of COE using G2 and CTA 4 (Table 1, entry 8), showing the presence of DF PCOE; see top zoomed region and the corresponding middle and bottom simulations for  $n = 7$ .

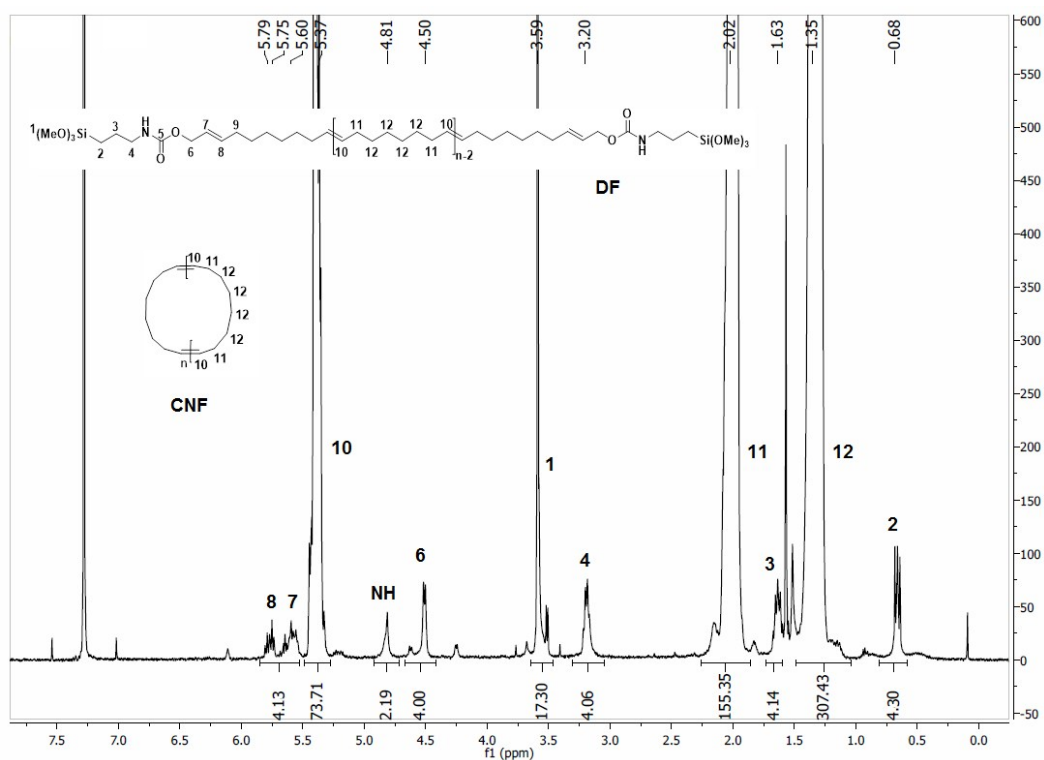

**Figure S34.**  $^1\text{H}$  NMR spectrum (500 MHz,  $\text{CDCl}_3$ , 298 K) of a crude polymer sample prepared by ROMP/CM of COE using **G2** and CTA **5** (Table 1, entry 10).

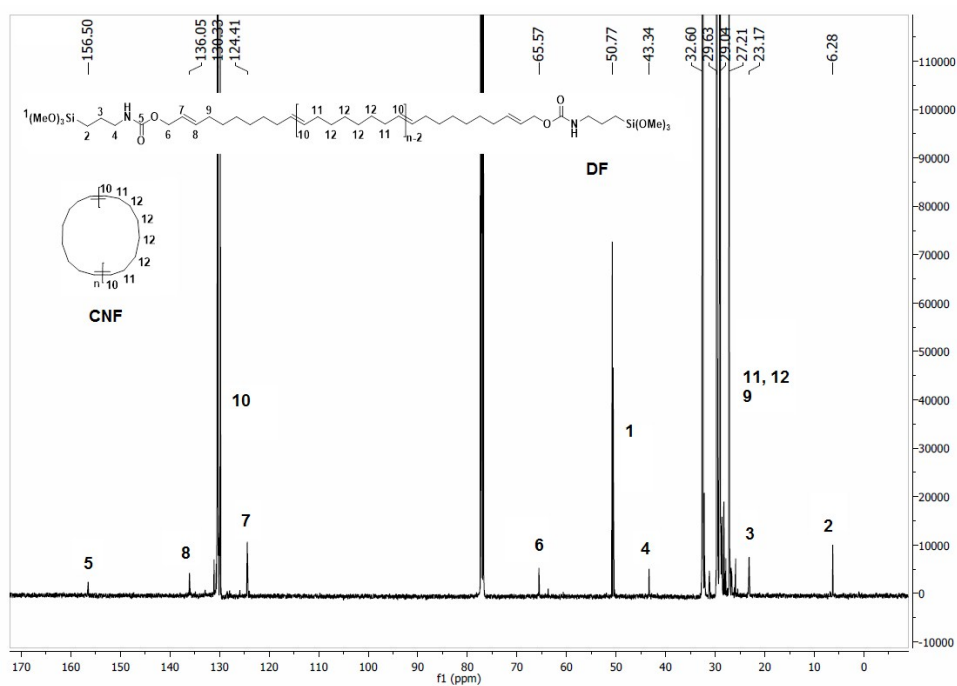

**Figure S35.**  $^{13}\text{C}\{^1\text{H}\}$  NMR spectrum (100 MHz,  $\text{CDCl}_3$ , 298 K) of a crude polymer prepared by ROMP/CM of COE using **G2** and CTA **5** (Table 1, entry 10).

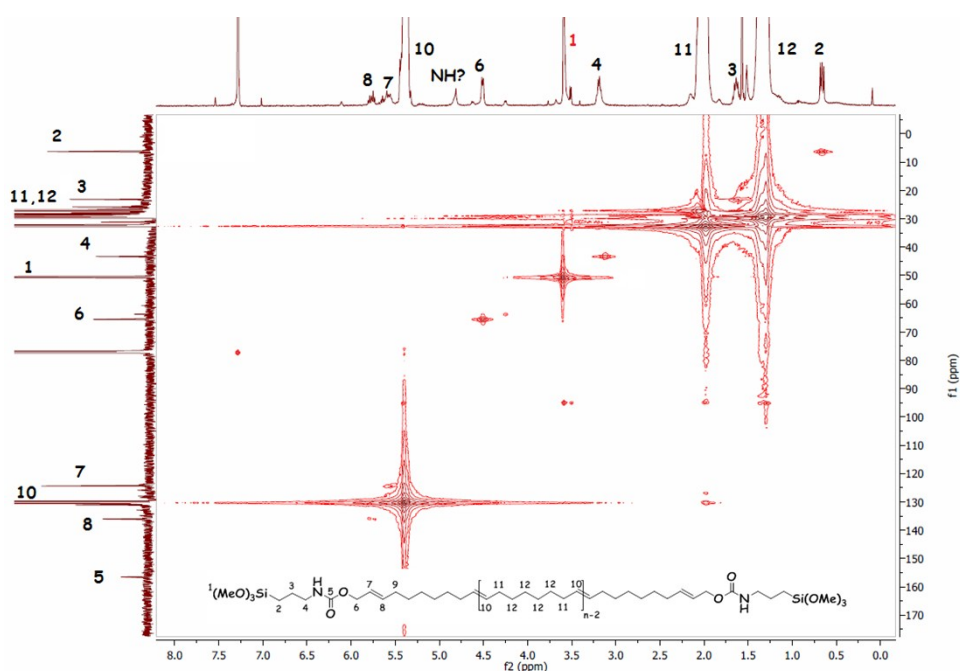

**Figure S36.**  $^1\text{H}$ - $^{13}\text{C}$  HMQC NMR spectrum (125 MHz,  $\text{CDCl}_3$ , 298 K) of a crude polymer prepared by ROMP/CM of COE using **G2** and CTA **5** (Table 1, entry 10).

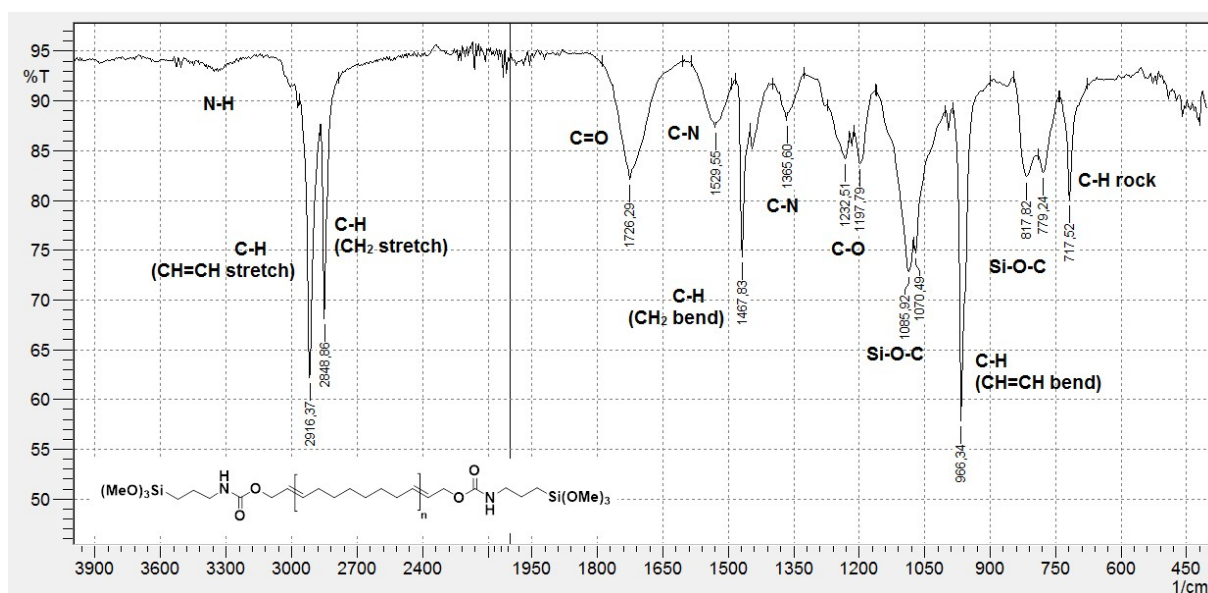

**Figure S37.** FTIR spectrum of a crude polymer prepared by ROMP/CM of COE using **G2** and CTA **5** (Table 1, entry 10).

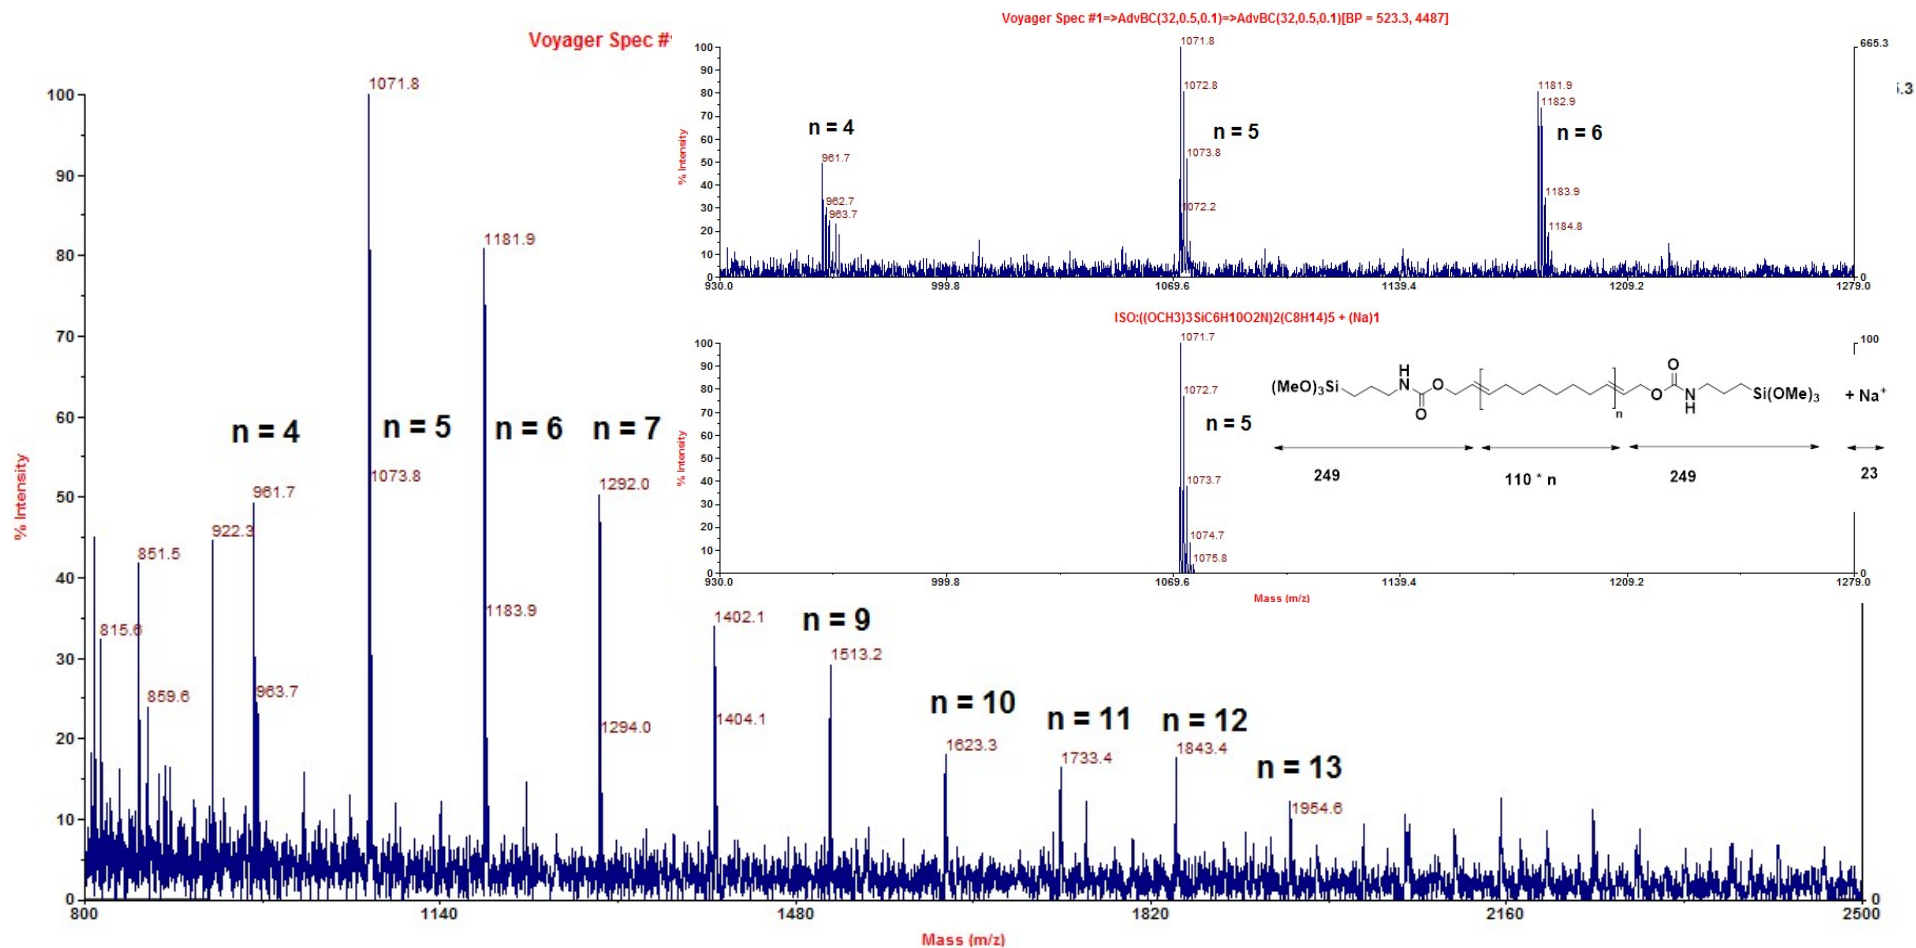

**Figure S38.** MALDI-ToF mass spectrum (DCTB matrix, sodium ionizing salt: NaI) of a crude polymer prepared by ROMP/CM of COE/CTA **5** using **G2** (Table 1, entry 10), showing the presence of DF PCOE; see top zoomed region and the corresponding middle and bottom simulations for  $n = 5$ .
